# Supplementary material for: Intra-striatal AAV2.retro administration leads to extensive retrograde transport in the rhesus macaque brain: implications for disease modeling and therapeutic development
Source: PubMed Central journal article supplement (PMC7181773; doi:10.1038/s41598-020-63559-7), 2020-04-24
Supplement: 41598_2020_63559_MOESM1_ESM.pdf [file 41598_2020_63559_MOESM1_ESM.pdf]

## SUPPLEMENTARY INFORMATION

### **Intra-striatal AAV2.retro administration leads to extensive retrograde transport in the rhesus macaque brain: implications for disease modeling and therapeutic development**

Alison R. Weiss<sup>1</sup>, William A. Liguore<sup>1</sup>, Jacqueline S. Domire<sup>1</sup>, Dana Button<sup>1</sup> and Jodi L. McBride<sup>1, 2, 3\*</sup>

<sup>1</sup>Division of Neuroscience, Oregon National Primate Research Center, Beaverton, OR; Departments of Behavioral Neuroscience<sup>2</sup> and Neurology<sup>3</sup>, Oregon Health and Science University, Portland, OR

**Supplemental Table S1.**

| <b>AAV2.retro</b> |         |         |         |         |         |         |         |         |          |
|-------------------|---------|---------|---------|---------|---------|---------|---------|---------|----------|
|                   | Caudate | Putamen | ACC     | AMY     | DPFC    | DPMC    | PMC     | SSC     | THALAMUS |
| Caudate           |         | 0.0003  | 0.0051  | 0.0011  | 0.0006  | 0.0009  | 0.0003  | 0.0002  | 0.0009   |
| Putamen           | 0.0003  |         | <0.0001 | <0.0001 | <0.0001 | <0.0001 | <0.0001 | <0.0001 | <0.0001  |
| ACC               | 0.0051  | <0.0001 |         | 1.0000  | 1.0000  | 1.0000  | 0.6605  | 0.2904  | 1.0000   |
| AMY               | 0.0011  | <0.0001 | 1.0000  |         | 1.0000  | 1.0000  | 1.0000  | 1.0000  | 1.0000   |
| DPFC              | 0.0006  | <0.0001 | 1.0000  | 1.0000  |         | 1.0000  | 1.0000  | 1.0000  | 1.0000   |
| DPMC              | 0.0009  | <0.0001 | 1.0000  | 1.0000  | 1.0000  |         | 1.0000  | 1.0000  | 1.0000   |
| PMC               | 0.0003  | <0.0001 | 0.6605  | 1.0000  | 1.0000  | 1.0000  |         | 1.0000  | 1.0000   |
| SSC               | 0.0002  | <0.0001 | 0.2904  | 1.0000  | 1.0000  | 1.0000  | 1.0000  |         | 1.0000   |
| THALAMUS          | 0.0009  | <0.0001 | 1.0000  | 1.0000  | 1.0000  | 1.0000  | 1.0000  | 1.0000  |          |

| <b>AAV2</b> |         |         |         |         |         |         |         |         |          |
|-------------|---------|---------|---------|---------|---------|---------|---------|---------|----------|
|             | Caudate | Putamen | ACC     | AMY     | DPFC    | DPMC    | PMC     | SSC     | THALAMUS |
| Caudate     |         | 0.0012  | 0.0141  | 0.0140  | 0.0140  | 0.0139  | 0.0141  | 0.0139  | 0.0141   |
| Putamen     | 0.0012  |         | <0.0001 | <0.0001 | <0.0001 | <0.0001 | <0.0001 | <0.0001 | <0.0001  |
| ACC         | 0.0141  | <0.0001 |         | 1.0000  | 1.0000  | 1.0000  | 1.0000  | 1.0000  | 1.0000   |
| AMY         | 0.0140  | <0.0001 | 1.0000  |         | 1.0000  | 1.0000  | 1.0000  | 1.0000  | 1.0000   |
| DPFC        | 0.0140  | <0.0001 | 1.0000  | 1.0000  |         | 1.0000  | 1.0000  | 1.0000  | 1.0000   |
| DPMC        | 0.0139  | <0.0001 | 1.0000  | 1.0000  | 1.0000  |         | 1.0000  | 1.0000  | 1.0000   |
| PMC         | 0.0141  | <0.0001 | 1.0000  | 1.0000  | 1.0000  | 1.0000  |         | 1.0000  | 1.0000   |
| SSC         | 0.0139  | <0.0001 | 1.0000  | 1.0000  | 1.0000  | 1.0000  | 1.0000  |         | 1.0000   |
| THALAMUS    | 0.0141  | <0.0001 | 1.0000  | 1.0000  | 1.0000  | 1.0000  | 1.0000  | 1.0000  |          |

**Supplemental Table S1. Matrix of p-values from post-hoc comparisons of cell counts between brain regions.** Tables report the p-values from one-tailed independent sample t-tests to compare the numbers of GFP+ cells in each ROI separately for each of the two serotypes, AAV2.retro (upper panel) and AAV2 (lower panel).

## Supplemental Table S2.

| High                          | Medium                        | Low                                | None                                 |
|-------------------------------|-------------------------------|------------------------------------|--------------------------------------|
| Dorsal prefrontal cortex      | Somatosensory cortex          | Parietal cortex                    | Occipital cortex                     |
| Ventral prefrontal cortex     | Orbitofrontal cortex          | Superior temporal cortex           | Cerebellum                           |
| Dorsal premotor cortex        | Rhinal cortex                 | Thalamus (MD/LD)                   | Thalamus (RE)                        |
| Ventral premotor cortex       | Thalamus (LP/VPL)             | Inferior temporal cortex           | Thalamus (VA/VL)                     |
| Anterior cingulate cortex     | Amygdala (BLN)                | Substantia nigra,<br>pars compacta | Substantia nigra,<br>pars reticulata |
| Subthalamic nucleus           | Clastrum                      | Globus Pallidus, int. segment      |                                      |
| Pre-supplemental motor cortex | Globus Pallidus, ext. segment |                                    |                                      |
| Supplemental motor cortex     |                               |                                    |                                      |
| Primary motor cortex          |                               |                                    |                                      |
| Insular Cortex                |                               |                                    |                                      |

**Supplemental Table S2. Relative levels of brain-wide mutant HTT expression following intra-caudate and intra-putamen injection of AAV2.retro-HTT85Q.** Brain regions were qualitatively ranked relative to one another, considering cell number and density, and placed into categories of high, medium, low and minimal/none. All regions listed here had less expression compared to the injected regions of the caudate and putamen. MD- medial dorsal, LD- lateral dorsal, RE- nucleus reuniens, BLN- basolateral nucleus, int.- internal, ext.- external, VA- ventral anterior, VL- ventral lateral, LP- lateral posterior, VPL- ventral posterolateral.
